# Supplementary material for: Sirt1 ablation promotes stress-induced loss of epigenetic and genomic hematopoietic stem and progenitor cell maintenance
Source: PubMed Central journal article supplement — J Exp Med. 2013 May 6;210(5):987–1001. doi: 10.1084/jem.20121608 (PMC3646499; doi:10.1084/jem.20121608), 2013-05-06
Supplement: supp_jem.20121608_JEM_20121608_sm.pdf [file supp_jem.20121608_JEM_20121608_sm.pdf]

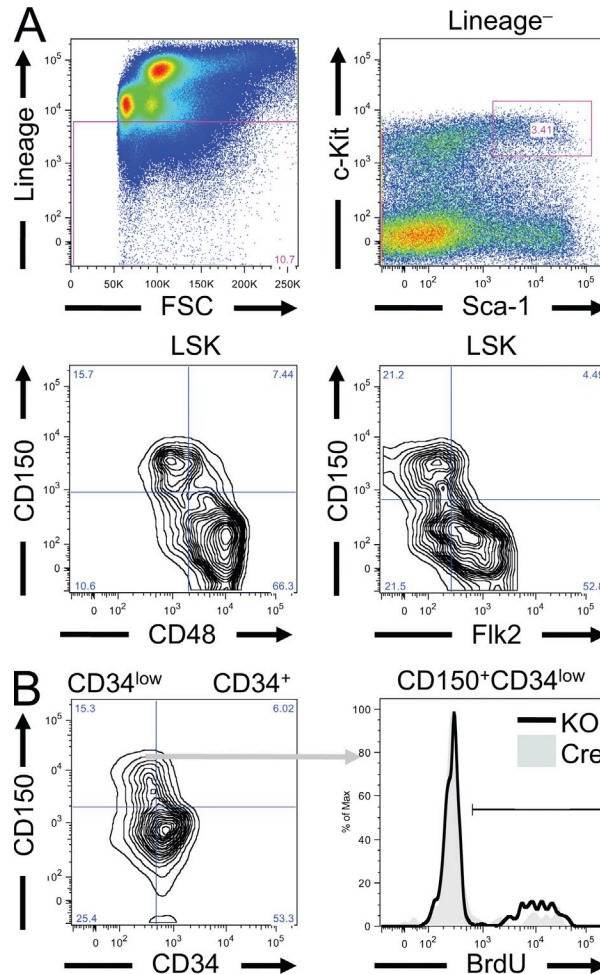

**Figure S1. FACS staining strategies for BM subset analyses.** (A) Gating strategy for FACS analyses of LSK subsets based on expression of CD150, CD48, and Flk2. (B) FACS gating strategy for analysis of BrdU incorporation in the CD150<sup>+</sup>CD34<sup>low</sup> progenitors. A representative histogram for BrdU labeling in Cre (dark gray) and SIRT1<sup>Δ/Δ</sup> (black) mice is shown.

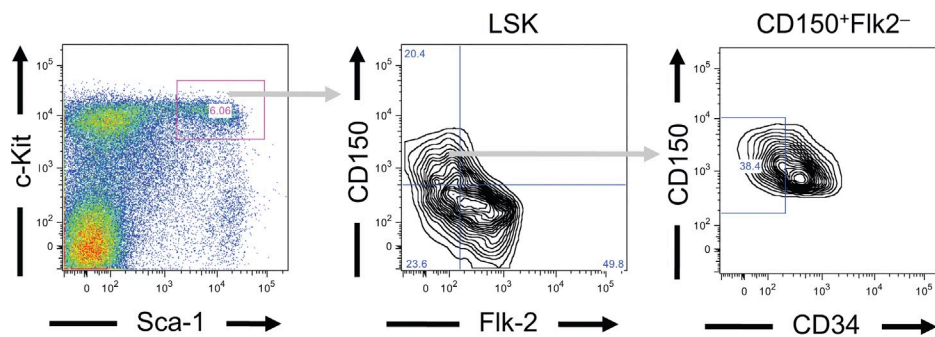

**Figure S2. Gating strategy for LSK subset analysis in Fig. 3 based on CD150 versus Flk2 staining.** CD150<sup>+</sup>Flk2<sup>-</sup> cells were further dissected based on CD34 expression. Data are from a 5-FU-treated SIRT1<sup>Δ/Δ</sup> mouse.

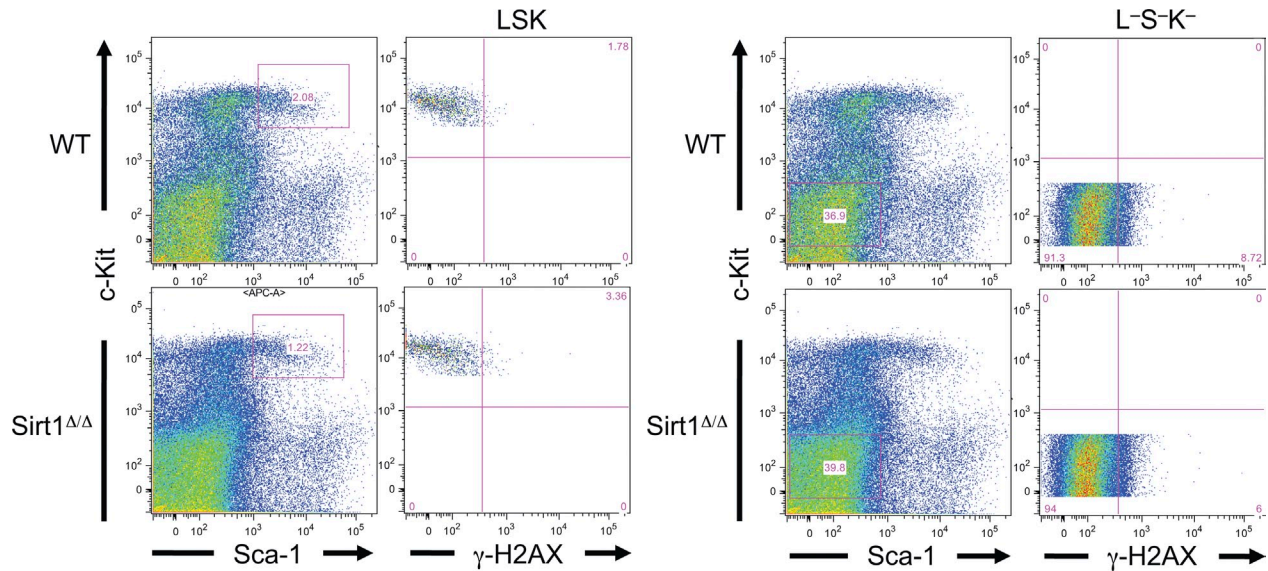

**Figure S3.** Representative FACS graphs for  $\gamma$ -H2AX and c-Kit in gated LSK and Lin<sup>-</sup>Sca-1<sup>-</sup>c-Kit<sup>-</sup> BM cells from mice shown in Fig. 5 G. SIRT1 $\Delta/\Delta$ : Sirt1-E4<sup>fl/fl</sup>; ERT2-Cre; WT: Sirt1-E4<sup>fl/fl</sup> control.

Table S1 is provided as an Excel file.

**Table S2.** PCR primer sequences

| PCR type         | Forward primer sequence (5'-3') | Reverse primer sequence (5'-3') |
|------------------|---------------------------------|---------------------------------|
| <b>ChIP qPCR</b> |                                 |                                 |
| Hoxa9-1          | GCTTCCCAGCCCCTCTCTG             | CTCCCTCCCTTCTCTCTTCC            |
| Hoxa9-2          | CCCCGCCCTCTCCTAAG               | TTTGGCCAGCAAAGAAAAGAGC          |
| Hoxa9-a7         | GACCAGATGAACCCACAGAGAG          | AGTAGCCTGAGAATGAATGGGG          |
| Hoxb8            | CAACAACAGACTCCGGCTTT            | TATCGTGTGGAGGGAATTGG            |
| Hoxc9            | AGGCTGAGTTTTCCGGTTCT            | GTGGCGAAAGGAGAGACAAT            |
| Hoxa10           | GGGGAACACTAGGTGGGG              | CCTAAATCACCGACCAGTTCTG          |
| <b>qRT-PCR</b>   |                                 |                                 |
| Sirt1 ex4        | TGTCTCCTGTGGGATCCGACTT          | AAACAATGCCGAGAATGAGAGCGG        |
| Sirt1 ex3-4      | TGGATGATATGACGCTGTGGCAGA        | AAGTCAGGAATCCCACAGGAGACA        |
| Hoxa7            | CCGAAGCCAGTTTCCGCATCTA          | ATTCCTTCTCCAGTTCACGCTCT         |
| Hoxa9            | AAACAATGCCGAGAATGAGAGCGG        | AAACTCCTTCTCCAGTTCACGCGT        |
| Hoxa10           | TGGGCAGTTCCAAAGGCGAAA           | CTTCGTGTAAGGGCAGCGTTTCTT        |
| GAPDH            | TCAGTGTAGCCCAAGATGCCCTT         | CCTGGAGAAACCTGCCAAGTATGA        |

All qPCRs were performed using SYBR green and an annealing temperature of 58°C.
